# Supplementary material
Source: PubMed Central journal article supplement (PMC4502743)
Supplement: kaup-10-12-981788-s001.pdf [file kaup-10-12-981788-s001.pdf]

## SUPPLEMENTAL INFORMATION

### **Inhibition of autophagy as a new means of improving chemotherapy efficiency in high-LC3B triple-negative breast cancers**

Sylvain Lefort<sup>1,2\*</sup>, Carine Joffre<sup>2,3\*</sup>, Yann Kieffer<sup>1,2</sup>, Anne-Marie Givel<sup>1,2</sup>, Brigitte Bourachot<sup>1,2</sup>,  
Giulia Zago<sup>2,3</sup>, Ivan Bieche<sup>4</sup>, Thierry Dubois<sup>5</sup>, Didier Meseure<sup>6</sup>, Anne Vincent-Salomon<sup>7</sup>,  
Jacques Camonis<sup>2,3\*</sup> and Fatima Mechta-Grigoriou<sup>1,2\*</sup>.

\* These authors contributed equally to this work.

Running Title: Role of autophagy in tumorigenesis and chemosensitivity of triple-negative breast cancer patients

<sup>1</sup>Laboratory of "Stress and Cancer", Institut Curie, 26 rue d'Ulm, 75248 Paris Cedex 05, France

<sup>2</sup>Inserm, U830, Paris, F-75248, France

<sup>3</sup>Laboratory of "Analysis of Transduction Pathways", Institut Curie, 26 rue d'Ulm, 75248 Paris Cedex 05, France

<sup>4</sup>Department of Oncogenetics, Hôpital René Huguenin, 92210 Saint-Cloud, France

<sup>5</sup>Department of translational research, Institut Curie, 26 rue d'Ulm, 75248 Paris Cedex 05, France

<sup>6</sup>Department of Pathology, Hôpital René Huguenin, 92210 Saint-Cloud, France.

<sup>7</sup>Department of tumor biology, Institut Curie, 26 rue d'Ulm, 75248 Paris Cedex 05, France

**Table S1.** Main patient characteristics and clinico-pathological features of the five BC cohorts analyzed in the study. Patient characteristics and clinical features of the cohorts referred to as Curie, Stockholm, Marseille and TCGA have been previously described in refs. 32–34 and <https://tcga-data.nci.nih.gov/tcga/> (see also Materials and Methods). BC subtypes were defined according to the ASCO's guidelines: LumA (ER<sup>+</sup> and/or PR<sup>+</sup> HER2<sup>-</sup>), LumB (ER<sup>+</sup> and/or PR<sup>+</sup>, HER2<sup>-</sup>, high mitotic index), HER2 (ER<sup>-</sup>, PR<sup>-</sup>, HER2<sup>+</sup>), TN (ER<sup>-</sup>, PR<sup>-</sup>, HER2<sup>-</sup>). The five BC cohorts were examined for information on tumor size (pT), mean age at diagnosis, number of retrieved and metastatic axillary lymph nodes (pN), number of distant metastases (pM), hormonal receptor status, the date of relapse, the date and cause of death (only death from breast cancer has been considered), and the type of therapy used (hormono-, chimio-, radio-therapies). pN was considered as negative for N0 and positive for N1, N2 and N3. pM was considered as negative for M0 and positive for M1. The table summarizes the main clinical characteristics of the cohorts, helping in their comparison.

**Table S2.** *MAP1LC3B* mRNA levels in BC cell lines. *MAP1LC3B* mRNA levels in Lum, HER2 and TN BC-derived cell lines either determined from Affymetrix U133 plus 2.0 microarray analysis (*MAP1LC3B* log<sub>2</sub> of probeset intensity, 208785\_s\_at) or quantified by qRT-PCR (Ct, threshold cycle). For qRT-PCR analysis (columns with Ct values), *MAP1LC3B* mRNA levels were normalized on the basis of the mean values of 3 housekeeping genes *TBP* (TATA box binding protein), *RPLP0* (ribosomal protein, large, P0) and *PPIA* [peptidylprolyl isomerase A [cyclophilin A]], as endogenous RNA controls for the total amount of RNA in each cell line. Ct means threshold cycle.

**Figure S1.** *MAP1LC3B* is not a prognostic marker in LumA, LumB and HER2 BC. **Top**, Kaplan-Meier curves of OS for Curie/Stockholm cohorts with respect to *MAP1LC3B* mRNA levels, in LumA BC ( $n = 34$  for low expression and  $n = 34$  for high expression; cut-off value = -0.38, scatter plot shown in **Fig. 1C**), LumB BC ( $n = 26$  for low expression and  $n = 27$  for high expression; cut-off value = 0.27, scatter plot shown in **Fig. 1C**) and HER2 BC ( $n = 21$  for low

expression and  $n = 24$  for high expression; cut-off value = 0.36, scatter plot shown in **Fig. 1C**), as indicated. p-values are based on Log-rank test. **Bottom**, Scatter plots of *MAP1LC3B* mRNA levels in TN BC subtype from the TCGA cohort. *MAP1LC3B* mRNA level was evaluated from Agilent G4502A\_07 array and processed by the TCGA as follows: Normalization using RMA algorithm and expression values were gene centered. Data are from <https://tcga-data.nci.nih.gov/tcga/>.

**Figure S2.** Verification of the specificity of the LC3B-directed antibody, used in this study. **(A)** MDA231 TN BC cells transfected with control- (si*Ctrl*) or *LC3B*-targeted (si*LC3B*) siRNA were fixed, embedded into paraffin, sectioned, and incubated with LC3B-specific antibody following the same protocol as the one used for IHC from BC patient samples. The specific LC3B staining is severely reduced in LC3B-depleted cells, confirming the specificity of the antibody in IHC experiments. **(B)** Bar graph showing reduced IHC staining in LC3B-depleted cells (si*LC3B*), compared to control (si*CTL*). **(C)** Western blots showing LC3B protein levels in MDA231 cells after transfection with control- (si*Ctrl*) or *LC3B*-targeted (si*LC3B*) siRNA. AP2A1/adaptin is used as an internal control for protein loading.

**Figure S3.** Automated quantification of autophagic vacuoles. **(A)** Representative confocal pictures from HeLa-GFP-LC3 cells cultured in growing normal medium (NM) or incubated with EBSS for 2 h with or without bafilomycin A<sub>1</sub> (BafA<sub>1</sub>; 100 nM). Scale bar = 10 μM. **(B)** Bar graph represents the average number of autophagosomes per cell based on the Fluofarma automated quantification algorithm. **(C-E)** Representative views of the same tumor sample following incubation with a mouse IgG1 antibody, used as a matched isotype control for LC3B staining **(C)**, with LC3B antibody **(D, left)**, or with LC3B antibody following deconvolution by Fluofarma algorithm, defining epithelial and stromal compartments **(D, right)**. **(E)** Representative views of the same tumor sample before **(E, raw images, left)** and after **(E, computer-generated images, right)** segmentations achieved using Fluofarma algorithm are shown with low **(upper panels)** and high **(lower panels)** magnification images,

after computer-generated delimitations of nuclear and plasma membranes (green and red lines, respectively).

**Figure S4.** Quantification of autophagosomes in epithelial and stromal cells in human BC samples. **(A)** Scatter plot of the average number of autophagosomes per cell based on the automatized quantification algorithm (tumor samples from Curie cohort) in stromal versus epithelial cells **(A, left)**, in stromal cells according to BC subtypes **(A, middle)** and in both epithelial and stromal cells according to BC subtypes **(A, right)**. Horizontal bars represent the median values. 27 LumA, 37 LumB, 33 HER2 and 40 TN tumors were analyzed. **(B)** Correlation between the average number of autophagosomes per epithelial cells and the number of autophagosomes per epithelial and stromal cells. Correlation coefficient was computed using Pearson's test. **(C)** Box-and-whisker plot showing that the percentage (%) of autophagosome-positive epithelial cells (defined by the automated method) is significantly higher in TN BC than in LumA, LumB and HER2 BC, confirming classic histological LC3B scoring (Curie cohort) **(Fig. 2B)**. **(D)** Each histogram represents, for a single TN tumor, the percentage distribution of epithelial cells according to the number of autophagosomes per cell. 5 TN tumors with a high number of autophagosomes per epithelial cell **(upper)** and 5 TN tumors with a low number of autophagosomes per epithelial cell **(lower)** are shown. **(E)** Positive correlation between automated quantification of LC3B immunofluorescence staining of TN and HER2 cell lines by ImageJ software or Fluofarma algorithm. **(F)** LC3B histological scoring (Hscore, see Methods) in the TN BC subtype from the St-Cloud cohort.

**Figure S5.** Levels of proteins involved in autophagy in human BC samples. **(A)** Western blots showing LC3B, ATG5, BECN1 and SQSTM1 expression levels in LumA and TN BC. Each line corresponds to individual BC patients. Ponceau staining was used as control for evaluation of protein loading. **(B)** Bar graphs represent the corresponding quantification of LC3B-II, BECN1, ATG5 and SQSTM1 protein levels. Data are expressed as means +/- sem

(n = at least 10 tumors per subtype). **(C)** Classification of the TN population of the Curie (**C, left**) and St-Cloud (**C, right**) cohorts by LC3B status, according to stage.

**Figure S6.** *MAP1LC3B* mRNA and protein levels in human BC cell lines. **(A)** *MAP1LC3B* mRNA levels in LumA, HER2 and TN BC cell lines measured by qRT-PCR experiments (see also **Table S2** for detailed quantitative values). Horizontal bars represent the median values ( $n \geq 6$  cell lines for each subtype). p-values are based on Student's t-test. **(B)** Bar graphs show the ratio of ATG5/AP2A1 (left panel) or BECN1/AP2A1 (right panel) protein levels, as assessed by densitometric analysis of the western blots shown in **Fig. 3B**. AP2A1 is used as an internal control for protein loading. Data are shown as means +/- sem (N = 3 independent experiments). p-values are based on Student's t-test. **(C)** Representative confocal pictures of MDA231 cells stably expressing the tandem probe RFP-GFP-LC3B cultivated in normal medium (NM) or treated with EBSS for 1 h, fixed and stained for DAPI (blue). This dual probe analysis enables a direct assessment of the level of autophagosome-lysosome fusion events and makes it possible to distinguish between autophagosomes (yellow) and autolysosomes (red). Scale bar = 10  $\mu$ m. **(D)** The bar graph represents the number of autophagosomes (**yellow dots in C, green bar**) and autolysosomes (**red dots in C, red bar**) per cell, expressed as the percentage of total number of dots. **(E)** The indicated TN cell lines were treated or not with EBSS for 2 h with or without bafilomycin A<sub>1</sub> (BafA<sub>1</sub>; 100 nM). Western blots for AP2A1 and LC3B are shown. The graph represents the LC3B-II/AP2A1 ratios, quantified by densitometric analysis of the western blots shown above. AP2A1 is used as an internal control for protein loading. N=3 independent experiments.

**Figure S7.** Role of autophagy in invasion of high-LC3B TN BC cells. **(A-F)** MDA231 TN cells were transiently transfected with control- (Ctrl) or with two different siRNAs directed against *BECN1* (si*BECN1*(1), si*BECN1*(2)), or *ATG5* [si*ATG5*(1), si*ATG5*(2) as indicated] and maintained in 3D conditions for 3 days. **(A,D)** Western blots showing BECN1 (**A**) or ATG5

(D) protein levels in MDA231 cells following transfection with siRNAs, as indicated. AP2A1 is used as an internal control for protein loading. (B,E) Representative bright field images from MDA231 TN cells +/- siRNAs, as indicated. Scale bars = 100  $\mu$ m. (C,F) Bar graphs represent the total area covered by the stellate structures per field (**left panel**; a total area of 0.85mm<sup>2</sup> has been evaluated; arbitrary unit, a.u) and the area per clone (**right panel**), as determined using Metamorph software. Data are from MDA231 TN cells +/- siRNAs, as indicated. Data shown are means +/- sem (N=3 independent experiments). (G) Representative photos from MDA231 TN cells transiently transfected with control- (*Ctrl*), *BECN1*-, *ATG5*-, *ATG7*-targeted siRNA and tested for invasion using a Transwell assay.

**Figure S8.** Role of autophagy in invasion of high-LC3B TN BC cells. (A) Western blots showing ATG7, ATG5, GAPDH and LC3B expression levels in MDA231 cells stably expressing the indicating shRNAs (**left panel**) TN BC without (-) or with (+) bafilomycin A<sub>1</sub> (BafA1) treatment. Bar graphs represent the corresponding quantification of LC3B-II/GAPDH ratios (**right panel**). Data are expressed as means +/- sem (N = 2). (B-E) Results are from MDA231 (B,C) or BT549 (D,E) cell lines stably expressing 2 different shRNA directed against *ATG7*, referred to as sh*Ctrl*, sh*ATG7*(1) or sh*ATG7*(2), and cultured in 3D conditions. (B) Western blots show ATG7 and LC3B protein levels in MDA231 stable cell lines, following 3D culture. AP2A1 is used as an internal control for protein loading. (C) Representative bright field images from MDA231 TN cells stably expressing shRNAs, as indicated, following 3D culture. Scale bars = 100  $\mu$ m (low magnification) and 50  $\mu$ m (high magnification). Bar graphs represent the total area of the stellate structures per field (left panel) or the area per clone (middle panel) and the total number of cells extracted after 3 days of 3D culture (right panel). Data are shown as means +/- sem (N = 3 independent experiments). p-values are based on Student's t-test. (D) Western blots show ATG7 and LC3B protein levels in BT549 stable cell lines, following 3D culture. AP2A1 is used as an internal control for protein loading. (E) Representative bright field images from BT549 TN cell lines stably expressing shRNAs, as

indicated, following 3D culture. Bar graphs represent the total area of the stellate structures per field (left panel) or the area per clone (middle panel) and the total number of cells extracted after 3 days of 3D culture (right panel). Data are shown as means  $\pm$  sem (N=3 independent experiments). p-values are based on Student's t-test.

**Figure S9.** Inhibition of autophagy reduces YAP1 activity in high-LC3B TN BC cells **(A)** Proliferation curves of MDA231 TN BC stable cell lines expressing different shRNA (referred to as *shCtrl*, *shATG5* or *shATG7*) in 2D culture, over 9 days. **(B-D)** Results are from MDA231 stable cell lines expressing different shRNA (referred to as *shCtrl*, *shATG7(1)* or *shATG7(2)*) and cultured in 3D conditions. Data are shown as means  $\pm$  sem (N=3 independent experiments). **(B)** Western blots showing the phosphorylated form of YAP1 on Ser127 residue (P-YAP1), YAP1 and AP2A1 proteins in stable cell lines following 3D culture. AP2A1 is used as internal control for protein loading. **(C)** The bar graph shows the corresponding quantification of P-YAP1/YAP1 protein level ratios. **(D)** mRNA levels of YAP1-target genes were monitored by RT-qPCR following 3D culture. GAPDH is used as an internal control for total mRNA levels. Data are shown as means  $\pm$  sem (N = 3 independent experiments). p-values are based on Student's t-test. **(E)** Results are from autophagy-proficient (*siCtrl*) or autophagy-deficient (*siATG5*) MDA231 cells, transfected with an empty vector (*Ctrl*) or a vector expressing YAP-S127A, a non-phosphorylatable mutant form of YAP, after 3 days of 3D culture. **(E, left)** Representative bright field images from ATG5-depleted cells expressing or not YAP-S127A, as indicated. Scale bars = 100  $\mu$ m. Bar graph **(E, middle)** represents the total area covered by the stellate structures per field. **(E, right)** Bar graph shows the total number of cells extracted from the corresponding 3D culture after 3 days, as a percentage of *siCtrl* cells transfected with an empty vector. Data are shown as means  $\pm$  sem (N = 2 independent experiments). p-values are based on Student's t-test.

**Figure S1**

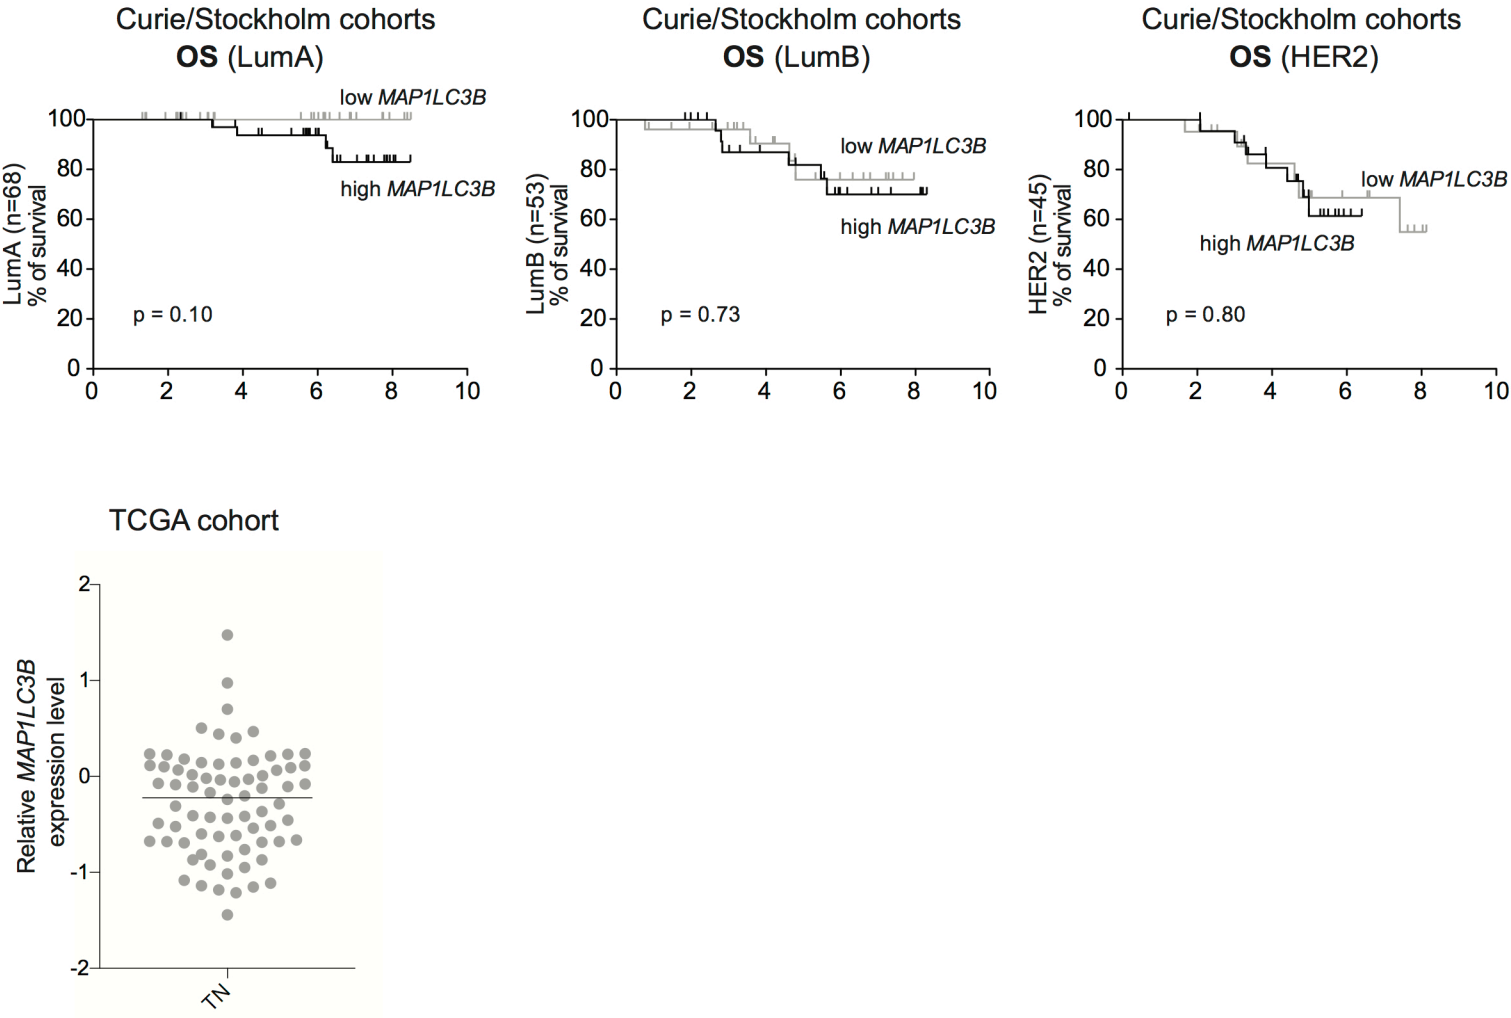



**Figure S2**

**A**

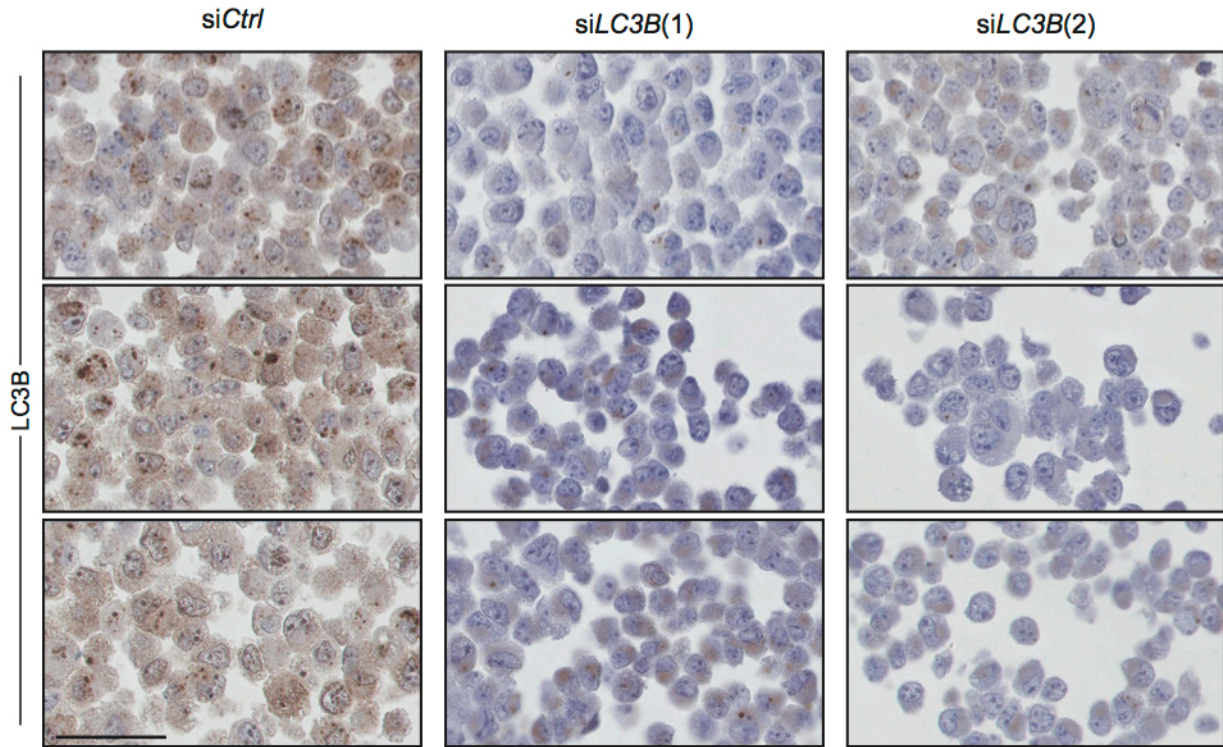

**B**

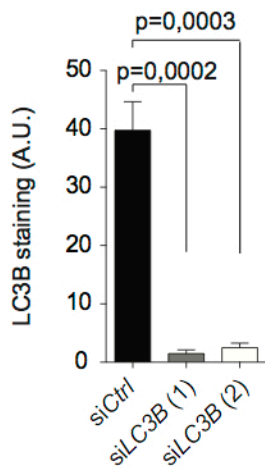

**C**

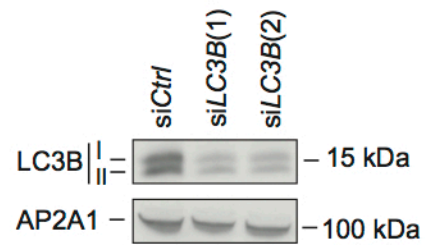

**Figure S3**

**A**

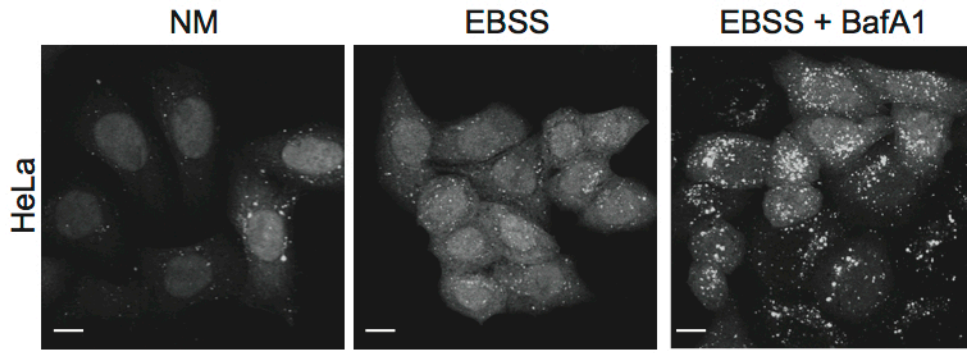

**B**

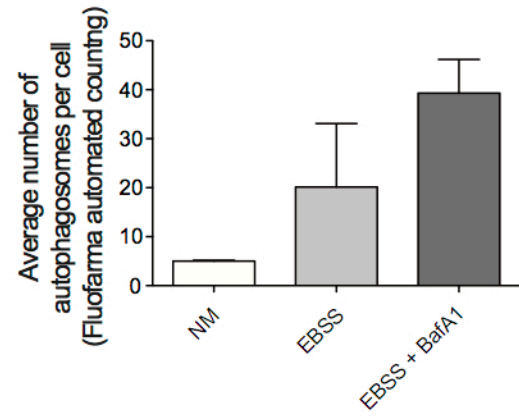

**C**

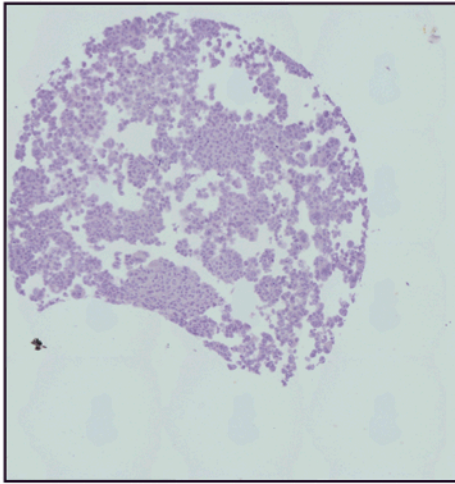

Mouse IgG1

**D**

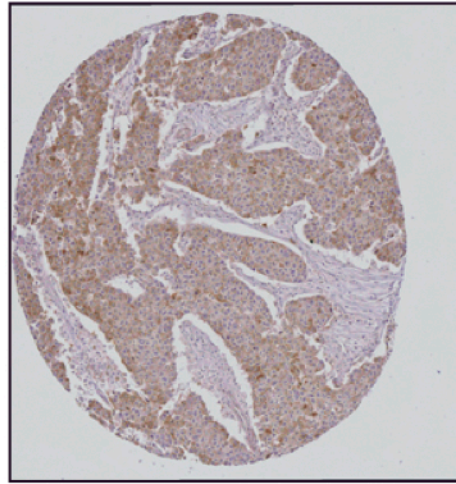

Raw image

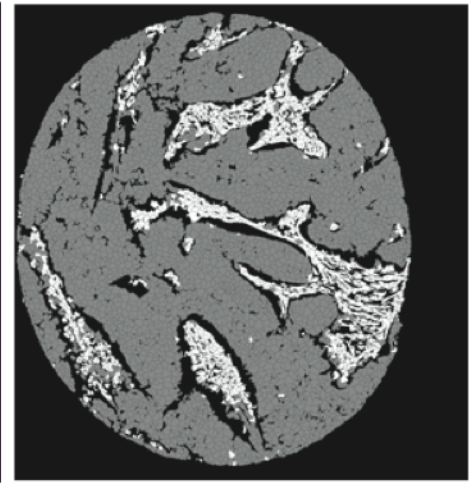

Epithelial-Stromal segmentation

**E**

Low magnification

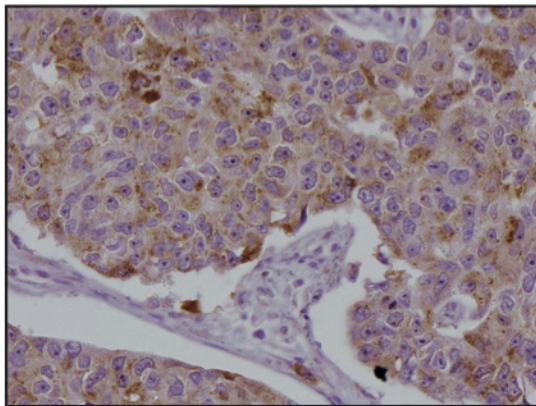

Raw image

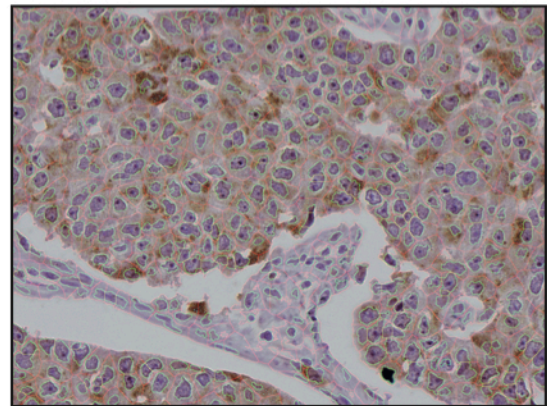

Computer-generated lines and dots

High magnification

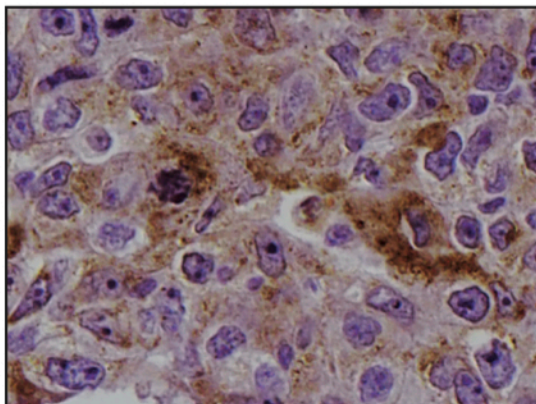

Raw image

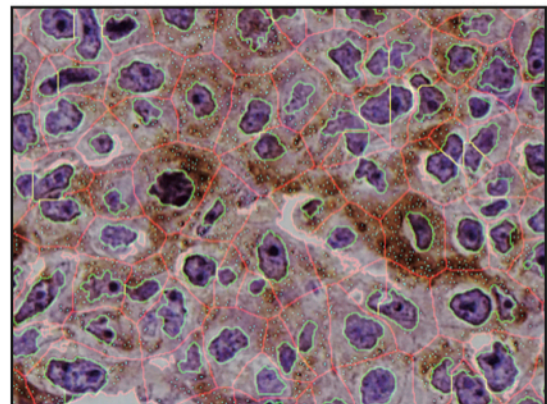

Computer-generated lines and dots

**Figure S4**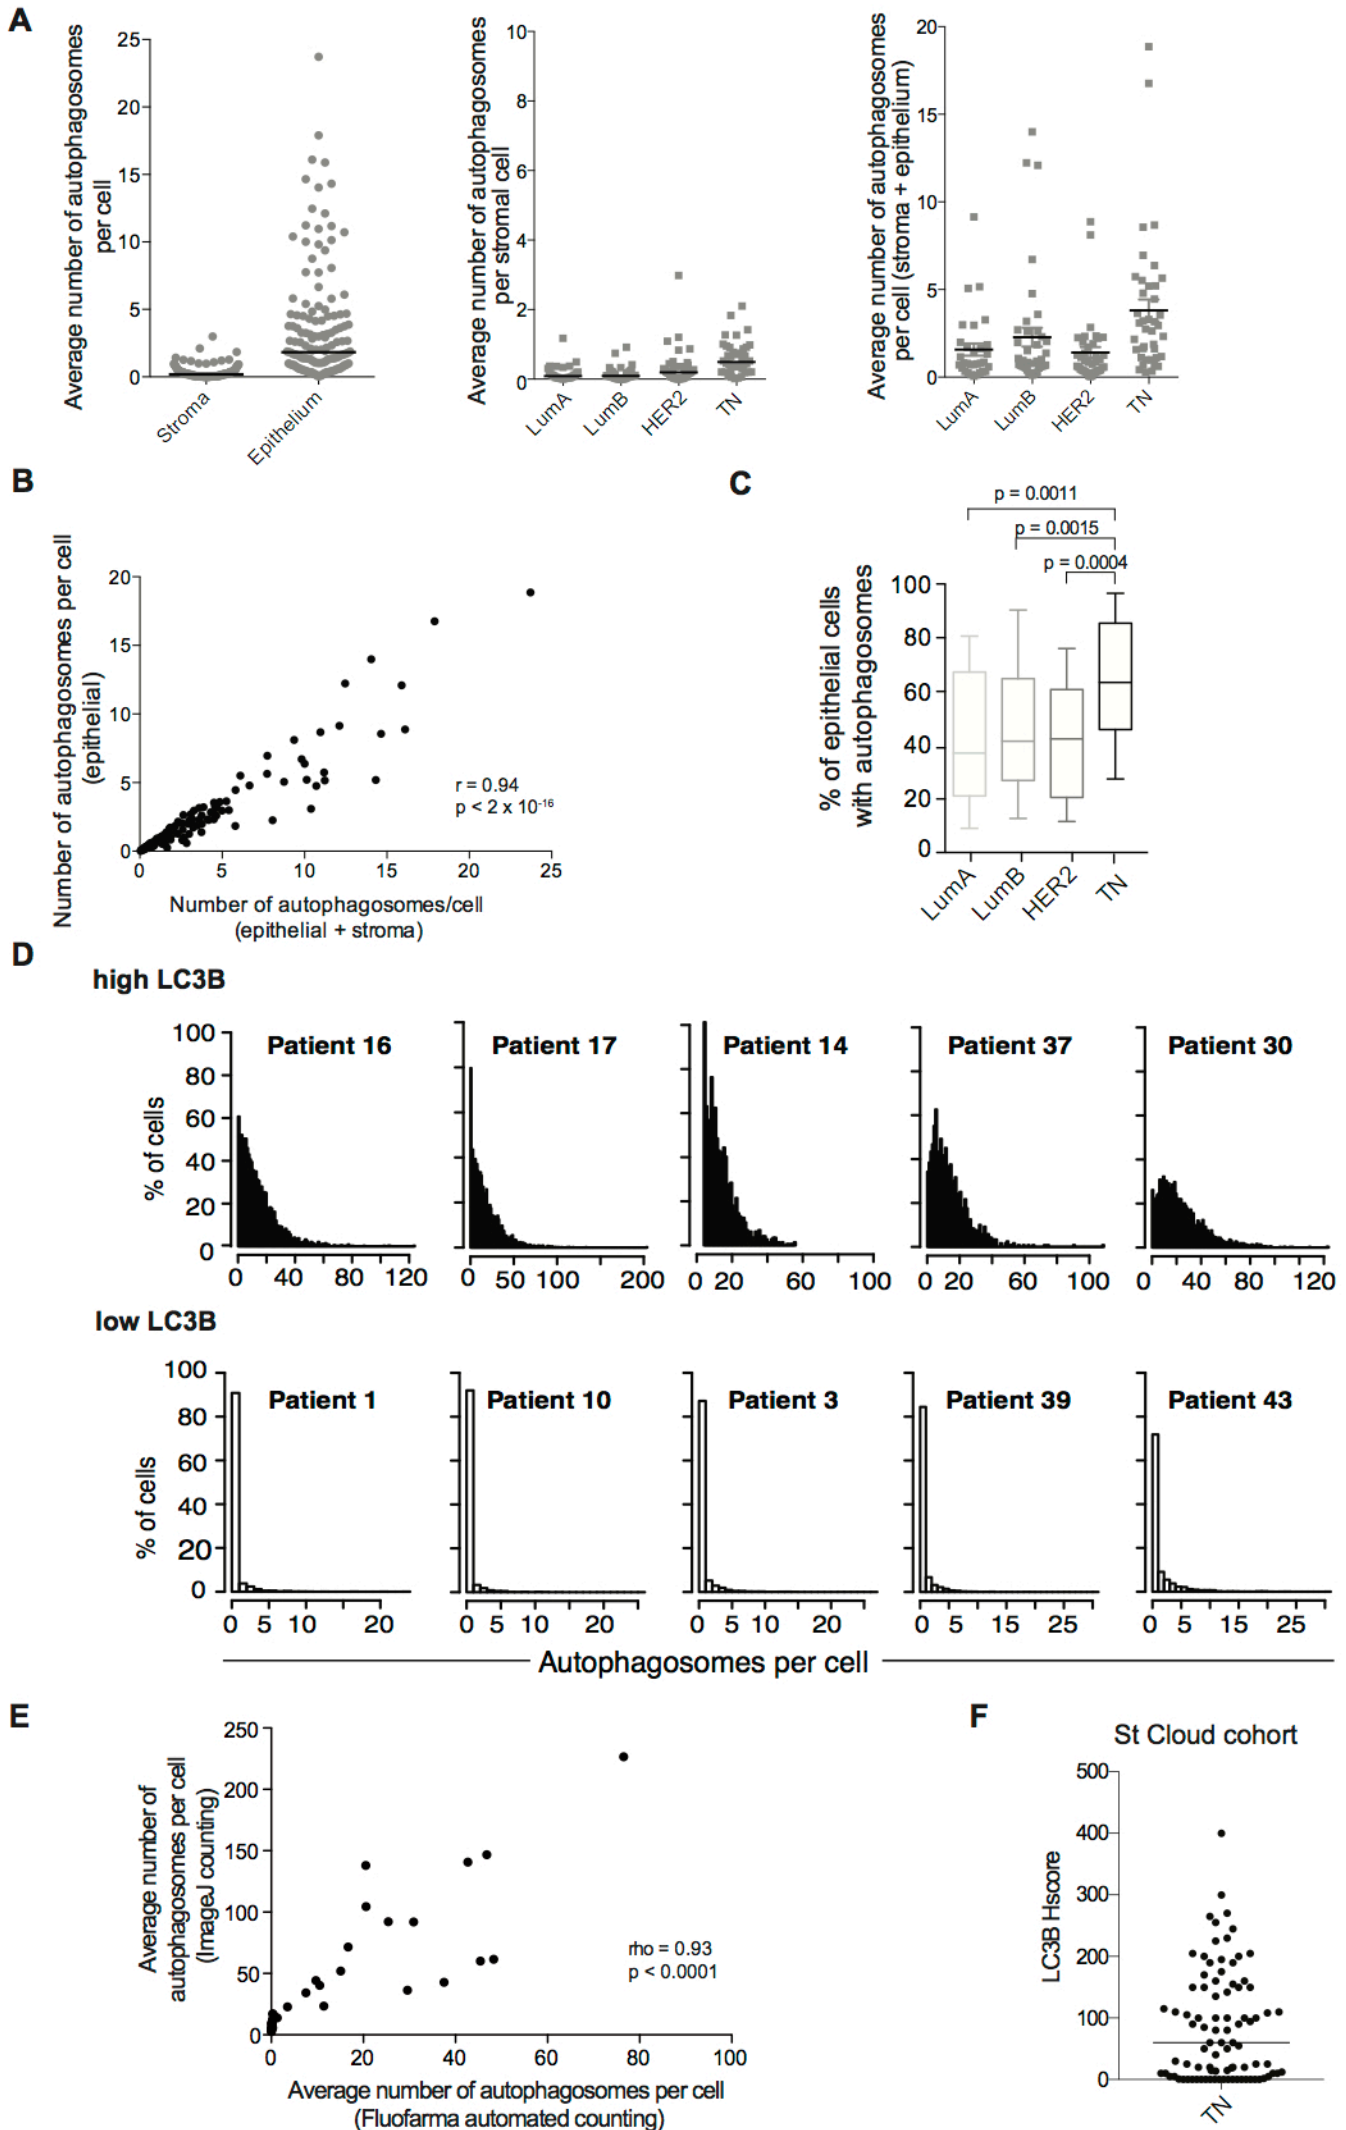

**Figure S5**

**A**

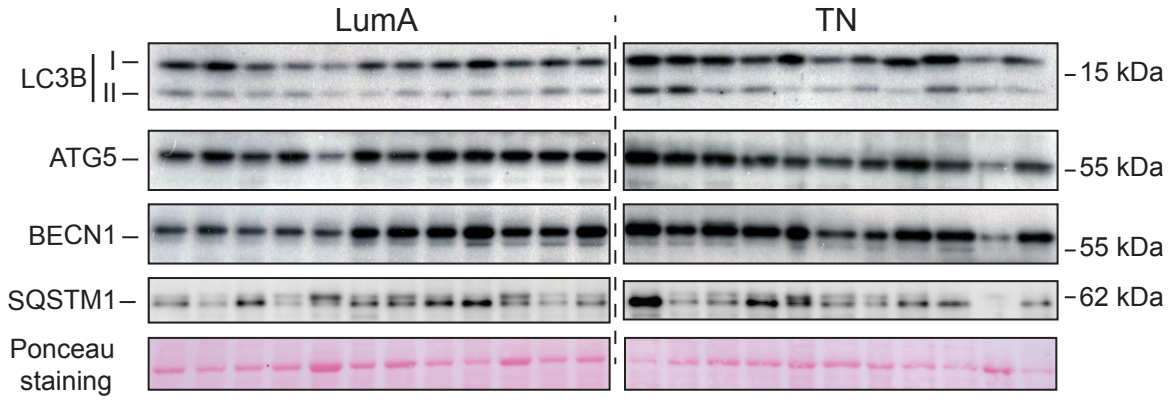

**B**

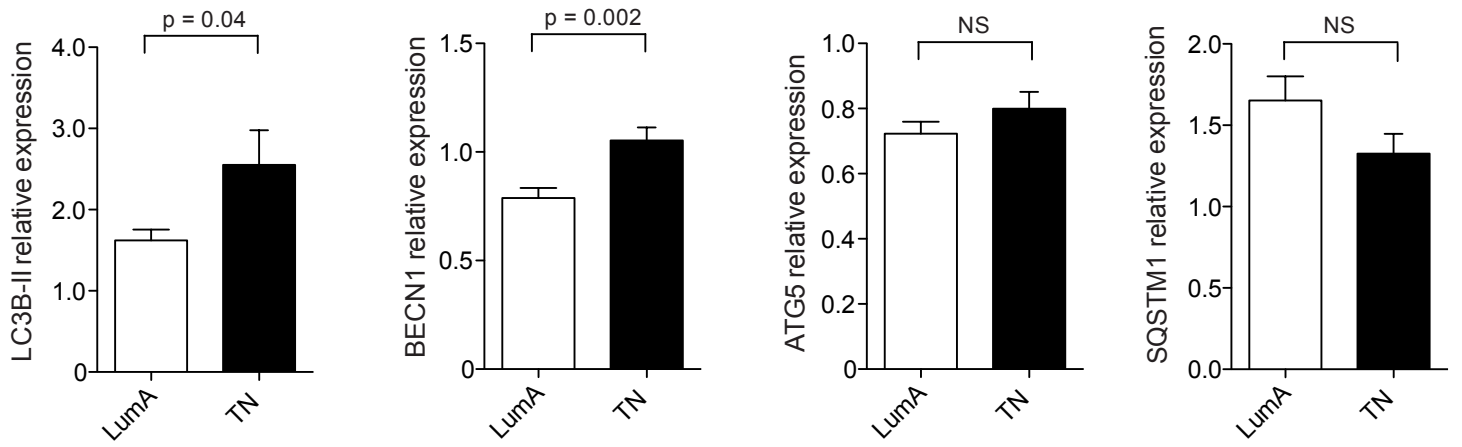

**C**

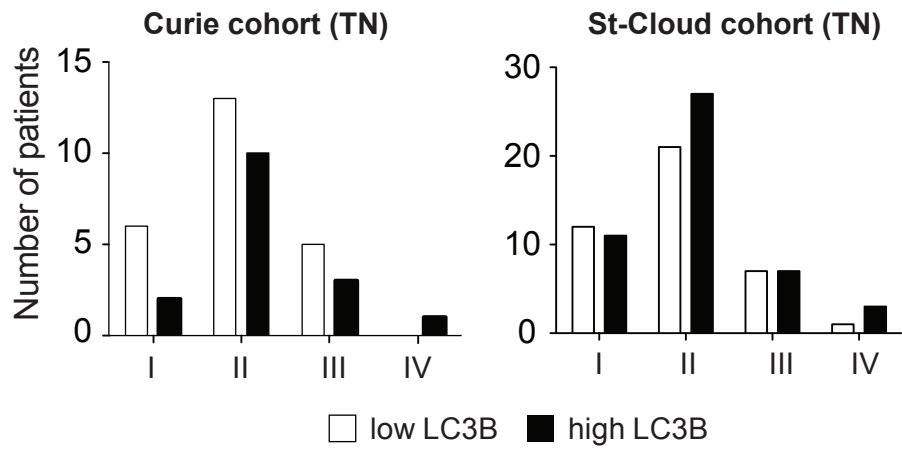

**Figure S6**

**A**

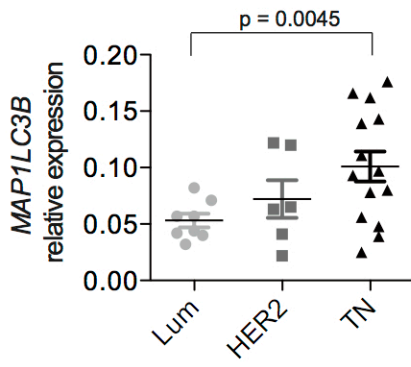

**B**

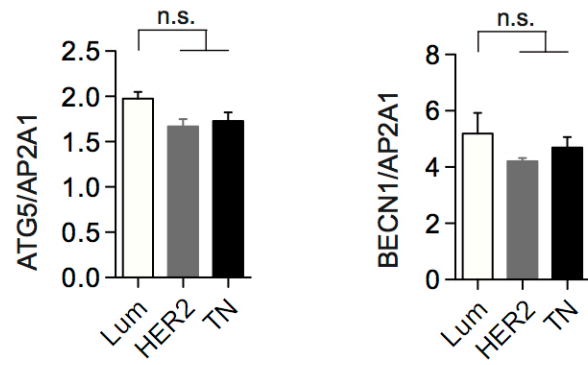

**C**

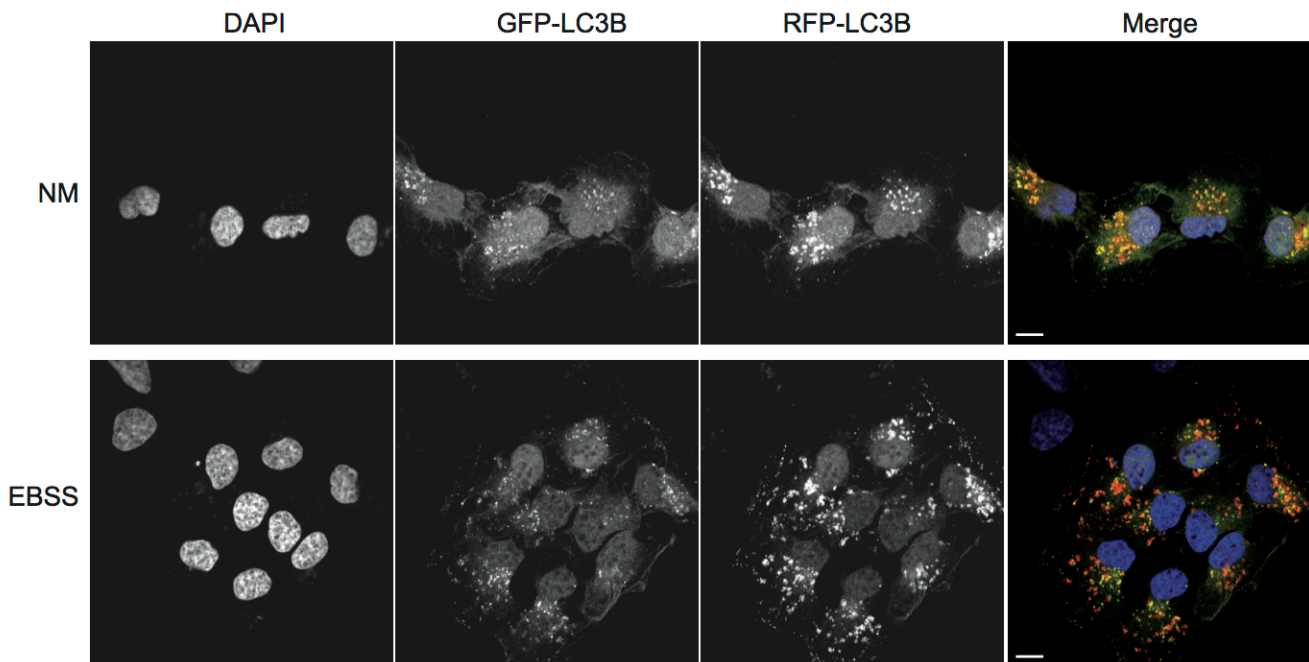

**D**

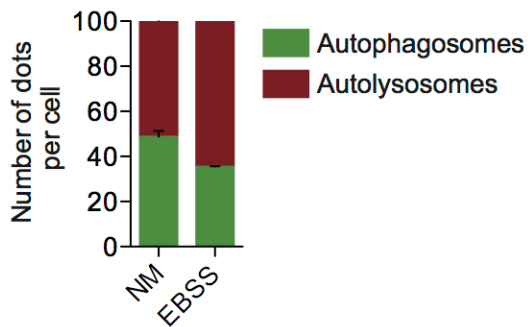

**E**

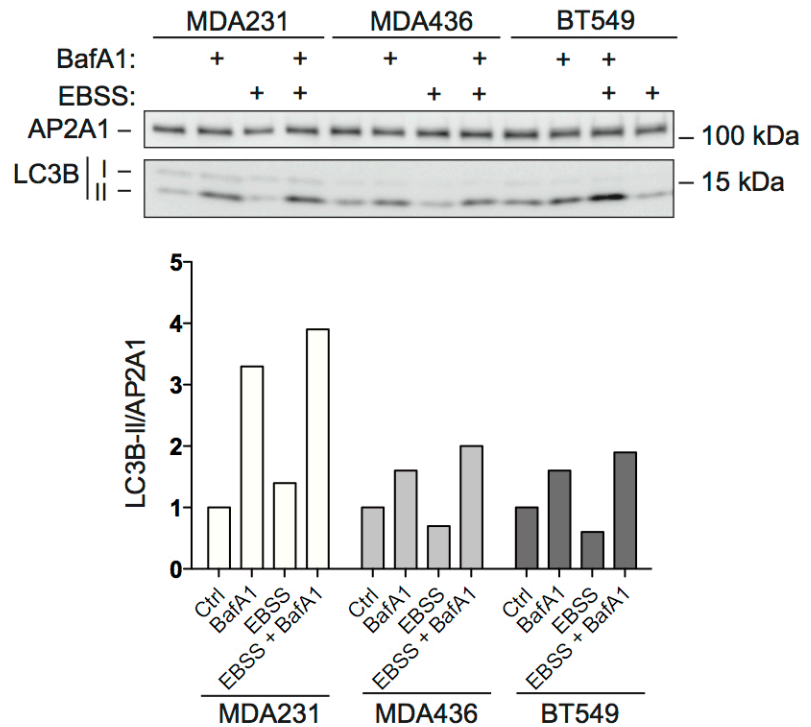

**Figure S7**

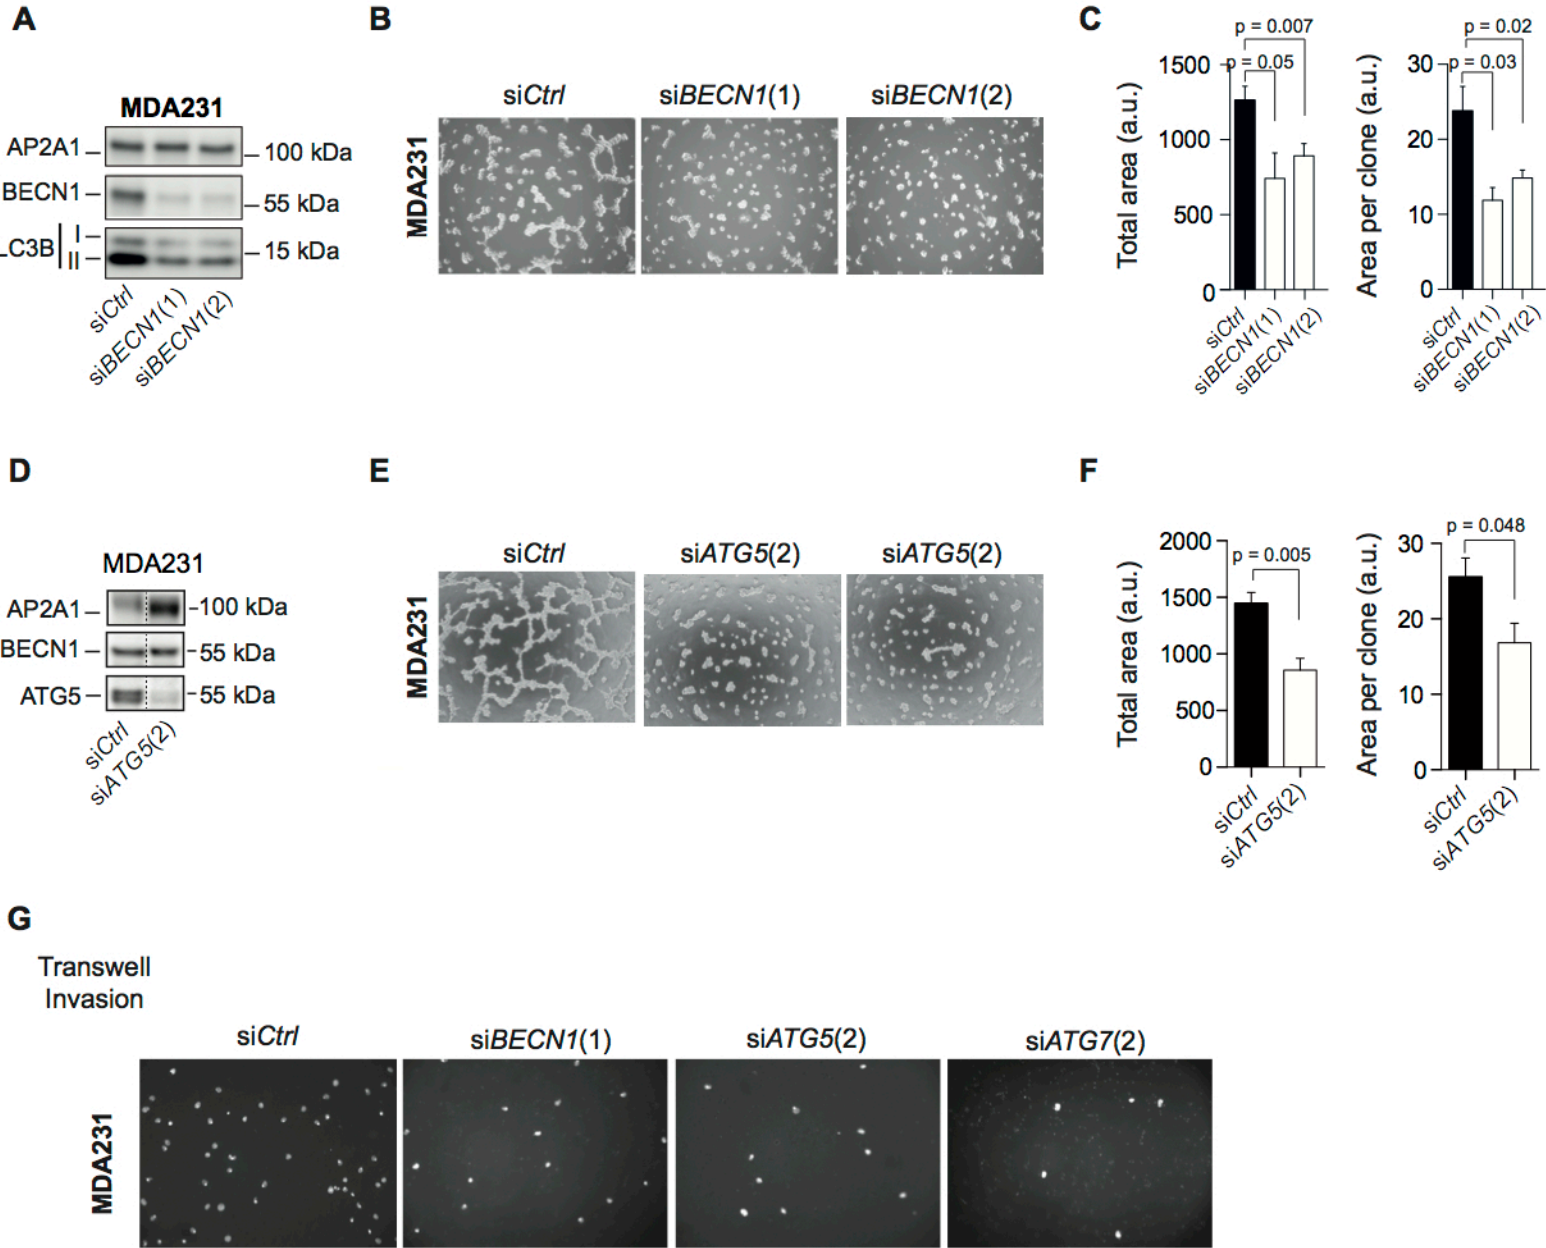

**Figure S8****A**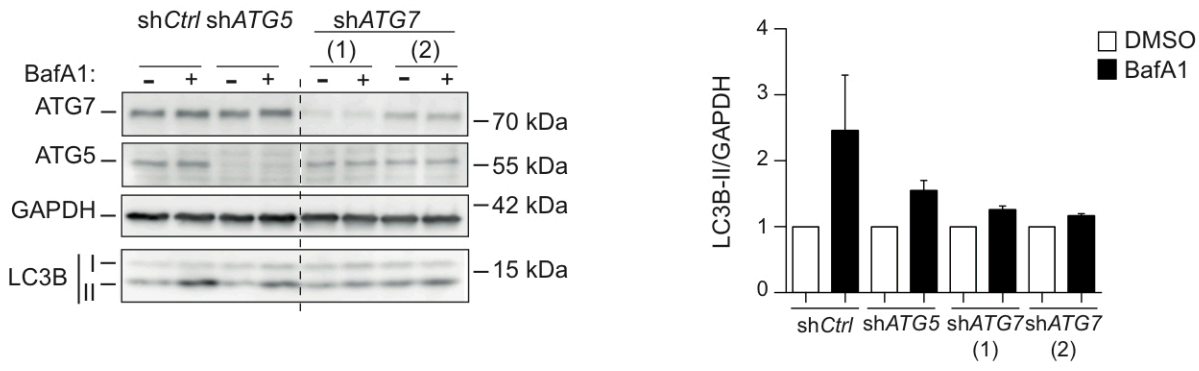**B**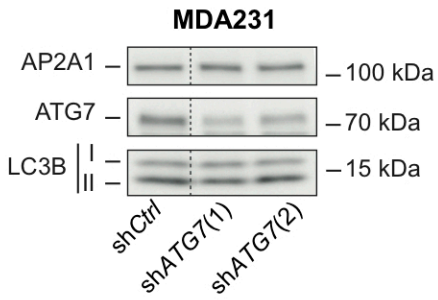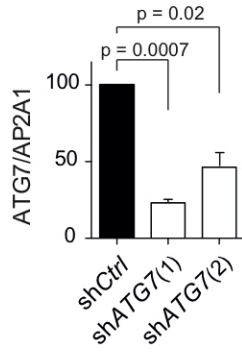**C**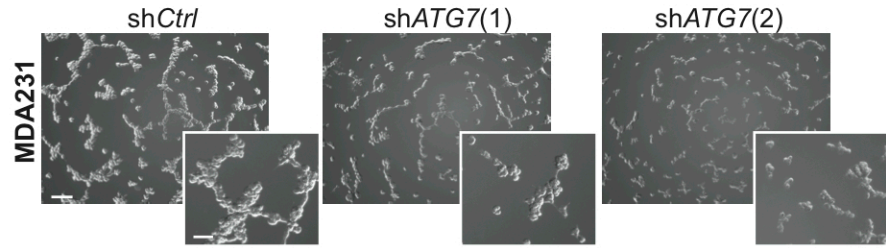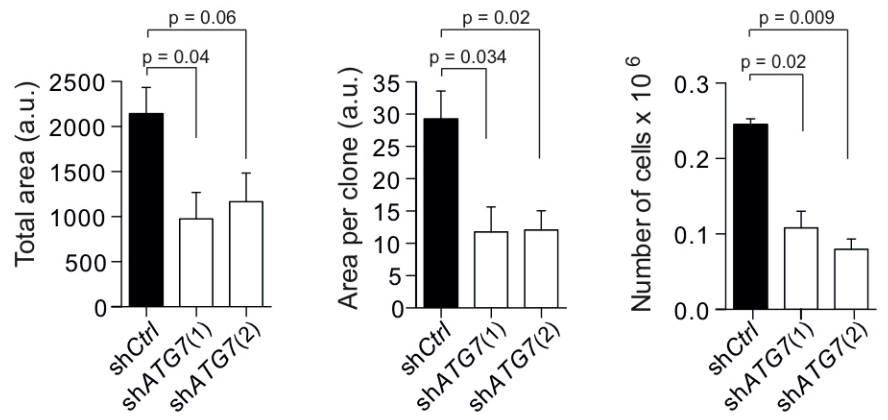**D**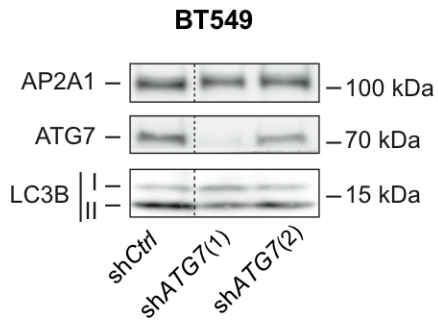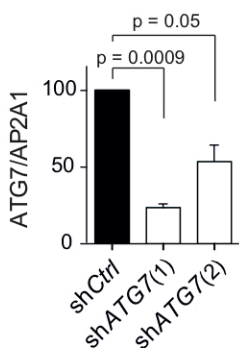**E**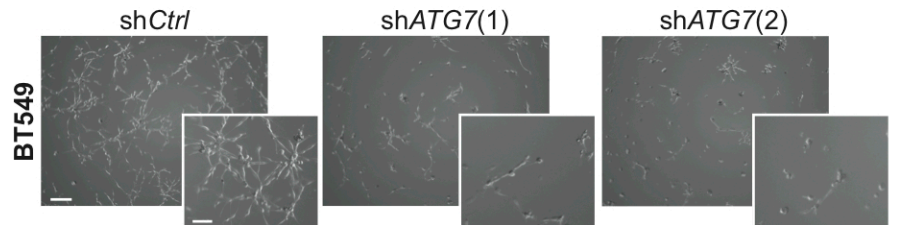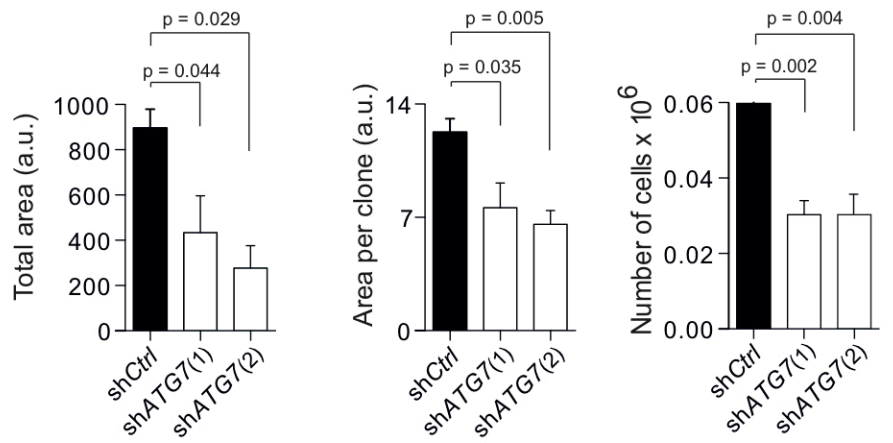

**Figure S9**

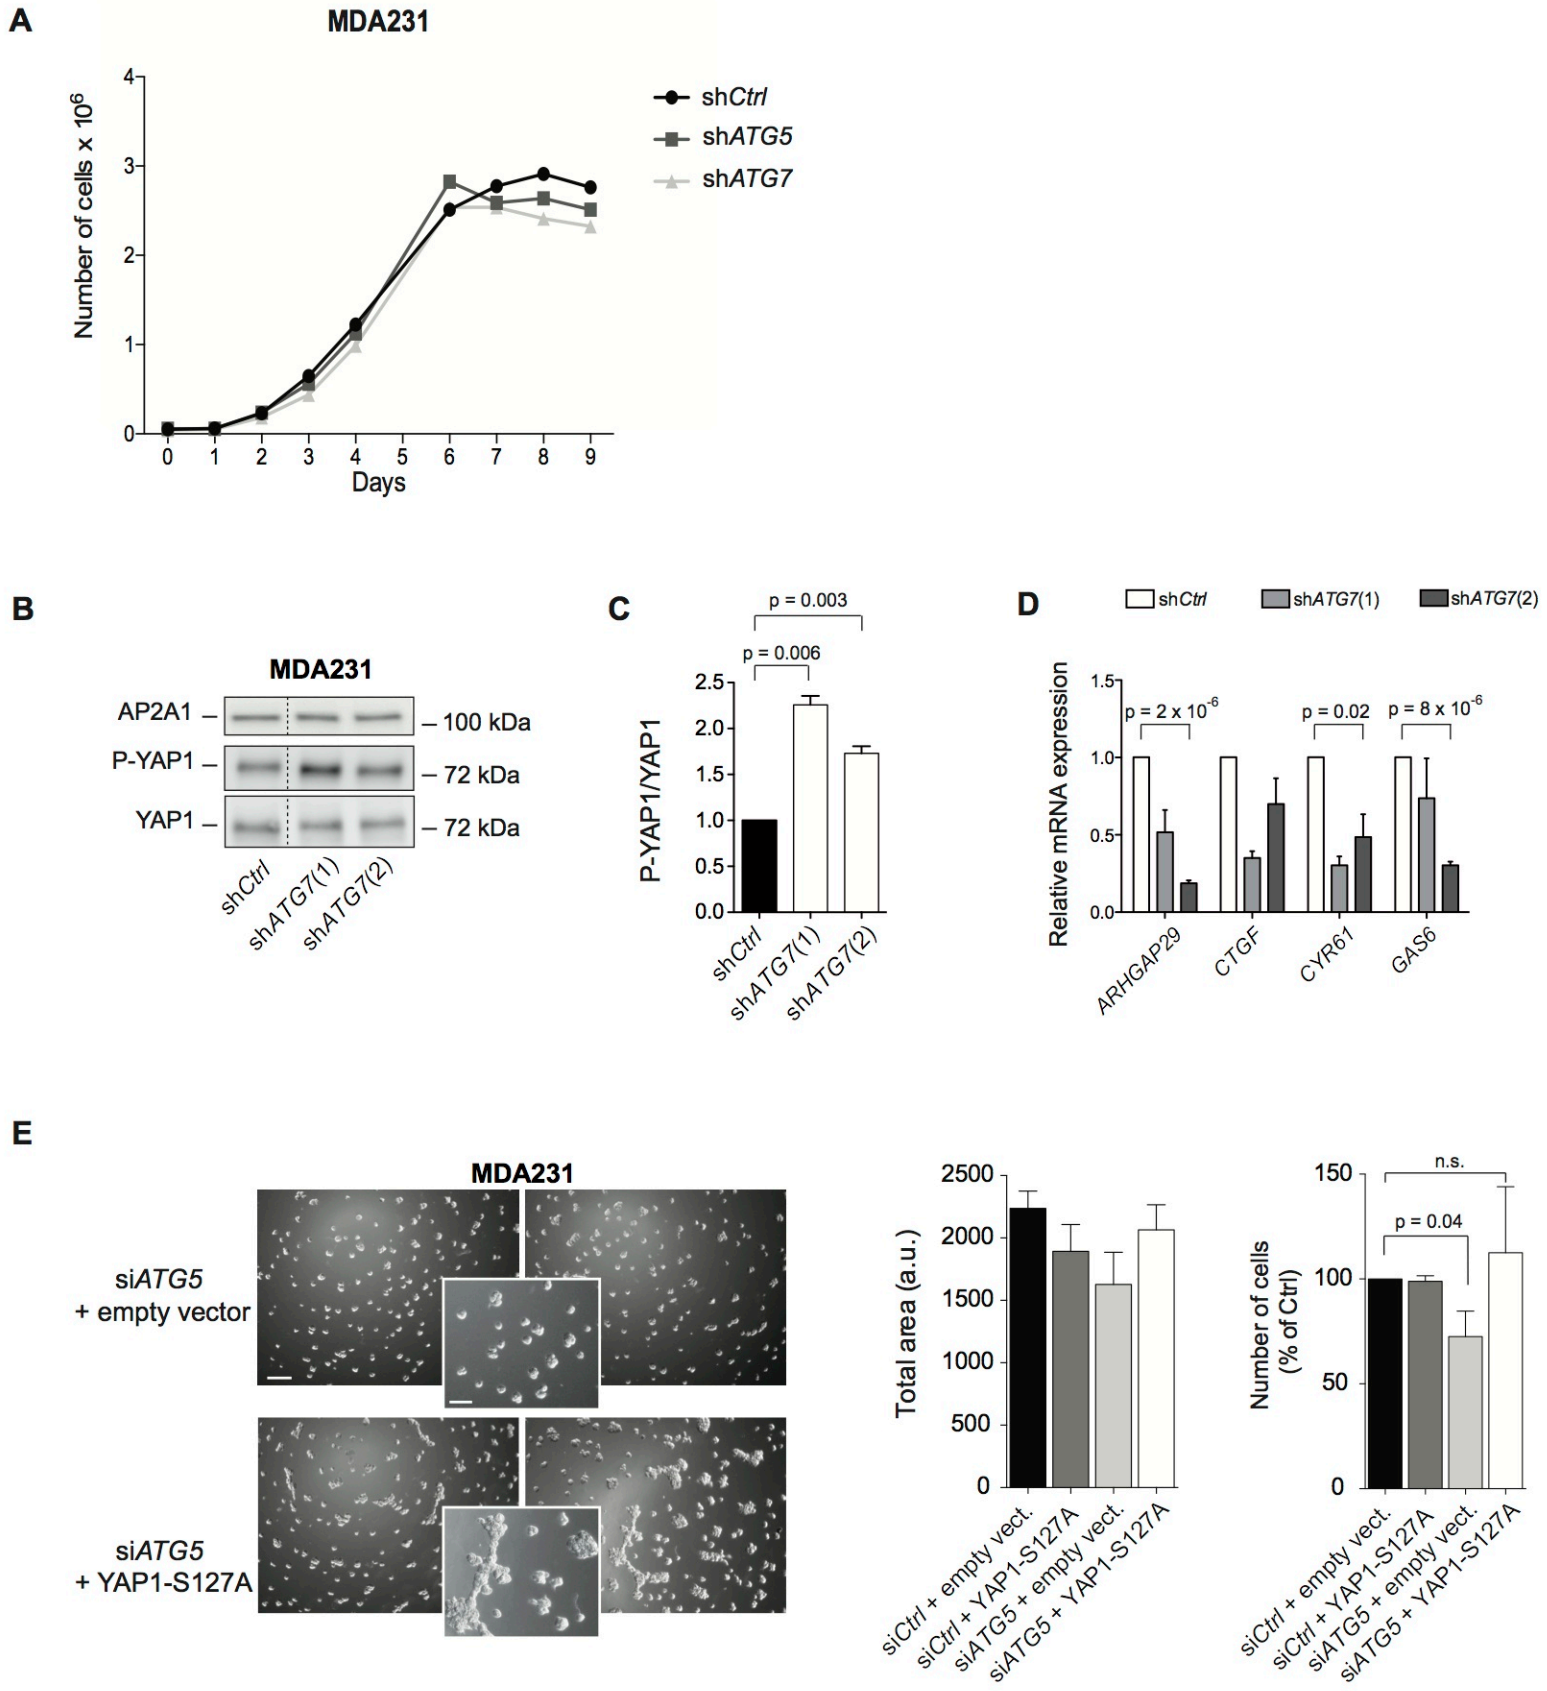



**Table S1.** Main patient characteristics and clinico-pathological features of the five BC cohorts analyzed in the study

|                                          |              | Curie          | Stockholm  | Marseille      | TCGA       | St-Cloud  |
|------------------------------------------|--------------|----------------|------------|----------------|------------|-----------|
| <b>Total</b>                             |              | 130            | 159        | 252            | 74         | 89        |
| <b>Inclusion</b>                         |              | 2000-2007      | 1994-1996  | 1992-2004      | 1988-2010  | 2002-2007 |
| <b>Average follow-up (years)</b>         |              | 4,1            | 6,1        | 5              | 3,2        | 5,8       |
| <b>Mean age at diagnosis</b>             |              | 54.1 (27 - 89) | 58         | 54.8 (24 - 85) | 52 (26-82) | -         |
| <b>Histological Grade</b>                | I            | 29 (23%)       | 28 (18%)   | 44 (17%)       | -          | 4 (4%)    |
|                                          | II           | 3 (2%)         | 58 (36%)   | 87 (35%)       | -          | 7 (8%)    |
|                                          | III          | 98 (75%)       | 61 (38%)   | 114 (45%)      | -          | 78 (88%)  |
|                                          | NA           | -              | 12 (8%)    | 7 (3%)         | 74 (100%)  | -         |
| <b>Pathological tumor Size pT</b>        | pT1          | 59 (45%)       | 99 (62%)   | 57 (23%)       | 15 (20%)   | 25 (28%)  |
|                                          | pT2          | 55 (42%)       | -          | 121 (48%)      | 50 (67%)   | 46 (52%)  |
|                                          | pT3          | 10 (8%)        | -          | 62 (25%)       | 5 (7%)     | 14 (16%)  |
|                                          | pT4          | 6 (5%)         | -          | -              | 2 (3%)     | 4 (4%)    |
|                                          | NA           | -              | 60 (38%)   | 12 (4%)        | 2 (3%)     | -         |
| <b>Pathological lymph node status pN</b> | Negative     | 58 (45%)       | 99 (62%)   | 111 (44%)      | 46 (62%)   | 70 (79%)  |
|                                          | Positive     | 70 (54%)       | 60 (38%)   | 135 (54%)      | 28 (38%)   | 19 (21%)  |
|                                          | NA           | 2 (1%)         | -          | 6 (2%)         | -          | -         |
| <b>Metastasis status pM</b>              | Negative     | 126 (97%)      | -          | -              | 72 (97%)   | -         |
|                                          | Positive     | 4 (3%)         | -          | -              | 2 (3%)     | -         |
|                                          | NA           | -              | 159 (100%) | 252 (100%)     | -          | 89 (100%) |
| <b>Mean tumor size (mm)</b>              |              | 25,9           | 22         | -              | -          | -         |
| <b>Subtype</b>                           | LumA         | 29 (22%)       | 39 (25%)   | 89 (35%)       | -          | -         |
|                                          | LumB         | 30 (23%)       | 23 (15%)   | 49 (19%)       | -          | -         |
|                                          | Her2         | 30 (23%)       | 15 (9%)    | 24 (10%)       | -          | -         |
|                                          | TN           | 41 (32%)       | 25 (16%)   | 61 (24%)       | 74 (100%)  | 89 (100%) |
|                                          | No Subtype   | -              | 20 (13%)   | -              | -          | -         |
|                                          | Normal-like  | -              | 37 (22%)   | 29 (12%)       | -          | -         |
| <b>Hormonotherapy</b>                    | Yes          | 50 (38%)       | 104 (65%)  | 90 (36%)       | -          | -         |
|                                          | No           | -              | 55 (35%)   | 117 (46%)      | -          | -         |
|                                          | NA           | 80 (62%)       | -          | 45 (18%)       | 74 (100%)  | 89 (100%) |
| <b>Radiotherapy</b>                      | Yes          | 121 (93%)      | -          | 188 (75%)      | 24 (33%)   | 79 (89%)  |
|                                          | No           | 9 (7%)         | -          | 10 (4%)        | -          | 10 (11%)  |
|                                          | NA           | -              | 159 (100%) | 54 (21%)       | 50 (67%)   | -         |
| <b>Chemotherapy</b>                      | Yes          | 100 (77%)      | 126 (79%)  | 155 (62%)      | 27 (36%)   | 77 (87%)  |
|                                          | No           | 30 (23%)       | 33 (21%)   | 45 (18%)       | 6 (8%)     | 12 (13%)  |
|                                          | NA           | -              | -          | 52 (20%)       | 41 (56%)   | -         |
| <b>TN Chemotherapy</b>                   | AC           | 32 (78%)       | -          | -              | -          | 59 (66%)  |
|                                          | Taxanes      | 2 (5%)         | -          | -              | -          | 5 (6%)    |
|                                          | AC + taxanes | 1 (2%)         | -          | -              | -          | 9 (10%)   |
|                                          | NA           | 6 (15%)        | 25 (100%)  | 61 (100%)      | 74 (100%)  | 16 (18%)  |

Patient characteristics and clinical features of the cohorts referred to as Curie, Stockholm, Marseille and TCGA have been previously described in refs. 32–34 and <https://tcga-data.nci.nih.gov/tcga/> (see also Materials and Methods). BC subtypes were defined according to the ASCO's guidelines: LumA (ER+ and/or PR+ HER2-), LumB (ER+ and/or PR+, HER2-, high mitotic index), HER2 (ER-, PR-, HER2+), TN (ER-, PR-, HER2-). The five BC cohorts were examined for information on tumor size (pT), mean age at diagnosis, number of retrieved and metastatic axillary lymph nodes (pN), number of distant metastases (pM), hormonal receptor status, the date of relapse, the date and cause of death (only death from breast cancer has been considered), and the type of therapy used (hormono-, chemo-, radio-therapies). pN was considered as negative for N0 and positive for N1, N2 and N3. pM was considered as negative for M0 and positive for M1. The table summarizes the main clinical characteristics of the cohorts, helping in their comparison.

**Table S2.** MAP1LC3B mRNA levels in BC cell lines

| Subtype    | Cell line      | MAP1LC3B (log2 of probeset intensity) | MAP1LC3B (Ct) | TBP (Ct) | RPLP0 (Ct) | PPIA (Ct) | Normalized MAP1LC3B |
|------------|----------------|---------------------------------------|---------------|----------|------------|-----------|---------------------|
| Lum        | BT-483         | 9.82922                               | 25.46         | 28.97    | 20.7       | 22.22     | 0.08163             |
|            | CAL-148        | 8.15649                               |               |          |            |           |                     |
|            | CAMA-1         | 9.56485                               | 27.1          | 27.91    | 21.27      | 23.26     | 0.04168             |
|            | EFM-19         | 8.65158                               |               |          |            |           |                     |
|            | HCC1428        | 8.83568                               | 25.76         | 28.48    | 19.61      | 21.16     | 0.03152             |
|            | KPL-1          | 10.1164                               |               |          |            |           |                     |
|            | MCF7           | 9.87316                               | 25.88         | 29.13    | 20.86      | 22.6      | 0.07103             |
|            | MDA-MB-134-VI  | 8.63808                               | 26.27         | 27.51    | 21.08      | 22.28     | 0.0568              |
|            | MDA-MB-175-VII | 9.90964                               |               |          |            |           |                     |
|            | MDA-MB-415     | 9.74844                               | 25.79         | 29.05    | 20.49      | 22.09     | 0.05724             |
| T-47D      | 9.8821         | 25.49                                 | 28.47         | 19.92    | 21.09      | 0.04368   |                     |
| UACC-812   | 8.57292        |                                       |               |          |            |           |                     |
| ZR-75-1    | 9.42224        | 26.41                                 | 28.19         | 20.41    | 22.92      | 0.03979   |                     |
| HER2       | AU565          | 8.44571                               |               |          |            |           |                     |
|            | BT-474         | 9.56742                               | 27.14         | 29.05    | 20.73      | 21.45     | 0.02197             |
|            | EFM-192A       | 9.37299                               |               |          |            |           |                     |
|            | HCC1419        | 9.02279                               |               |          |            |           |                     |
|            | HCC1569        | 8.41577                               | 25.85         | 28.17    | 20.9       | 21.99     | 0.06551             |
|            | HCC1954        | 10.0596                               | 24.7          | 27.91    | 20.87      | 21.36     | 0.12233             |
|            | HCC202         | 9.59094                               |               |          |            |           |                     |
|            | HCC2218        | 8.27281                               |               |          |            |           |                     |
|            | JIMT-1         | 11.7046                               |               |          |            |           |                     |
|            | MDA-MB-361     | 10.4209                               | 25.39         | 28.31    | 21.16      | 22.7      | 0.11829             |
| MDA-MB-453 | 8.29676        | 26.28                                 | 28.16         | 21.28    | 22.34      | 0.06303   |                     |
| SK-BR-3    | 8.4241         | 26.28                                 | 28.21         | 21.03    | 21.21      | 0.04158   |                     |
| ZR-75-30   | 8.59943        |                                       |               |          |            |           |                     |
| TN         | BT-20          | 10.3084                               | 24.18         | 27.68    | 20.67      | 20.85     | 0.13932             |
|            | BT-549         | 10.7133                               | 24.69         | 28.18    | 21.33      | 21.95     | 0.17579             |
|            | CAL-120        | 10.6969                               |               |          |            |           |                     |
|            | CAL-51         | 9.41878                               |               |          |            |           |                     |
|            | CAL-85-1       | 10.074                                |               |          |            |           |                     |
|            | DU4475         | 9.54485                               |               |          |            |           |                     |
|            | HCC1143        | 8.97916                               | 25.58         | 26.71    | 20.15      | 20.53     | 0.03916             |
|            | HCC1187        | 10.1825                               | 25.41         | 27.54    | 20.09      | 21.65     | 0.05585             |
|            | HCC1395        | 11.1506                               |               |          |            |           |                     |
|            | HCC1500        | 10.562                                | 23.52         | 26.22    | 20.27      | 20.39     | 0.16273             |
|            | HCC1599        | 8.03435                               | 27.34         | 28.51    | 20.68      | 23.12     | 0.02487             |
|            | HCC1806        | 9.40838                               |               |          |            |           |                     |
|            | HCC1937        | 10.296                                | 24.22         | 27.84    | 20.54      | 21.87     | 0.16609             |
|            | HCC2157        | 9.38436                               |               |          |            |           |                     |
|            | HCC38          | 10.3581                               | 24.31         | 28.73    | 19.38      | 21.55     | 0.08019             |
|            | HCC70          | 10.1764                               | 24.15         | 27.65    | 20.19      | 20.11     | 0.0935              |
|            | HDQ-P1         | 9.46084                               |               |          |            |           |                     |
|            | Hs 578T        | 10.9184                               | 24.8          | 28.65    | 21.08      | 21.86     | 0.1435              |
|            | MDA-MB-157     | 8.10773                               | 25.76         | 27.26    | 20.46      | 21.25     | 0.048               |
|            | MDA-MB-231     | 9.54688                               | 24.83         | 26.92    | 20.04      | 21.41     | 0.07775             |
| MDA-MB-436 | 10.6143        | 24.41                                 | 27.55         | 20.1     | 21.61      | 0.11131   |                     |
| MDA-MB-468 | 10.3774        | 24                                    | 26.95         | 20.23    | 19.92      | 0.09767   |                     |
| UACC-893   | 9.96325        |                                       |               |          |            |           |                     |
| YMB-1      | 9.29721        |                                       |               |          |            |           |                     |

MAP1LC3B mRNA levels in Lum, HER2 and TN BC-derived cell lines either determined from Affymetrix U133 plus 2.0 microarray analysis (MAP1LC3B log2 of probeset intensity, 208785\_s\_at) or quantified by qRT-PCR (Ct, threshold cycle). For qRT-PCR analysis (columns with Ct values), MAP1LC3B mRNA levels were normalized on the basis of the mean values of 3 housekeeping genes TBP (TATA box binding protein), RPLP0 (ribosomal protein, large, P0) and PPIA (peptidylprolyl isomerase A [cyclophilin A]), as endogenous RNA controls for the total amount of RNA in each cell line. Ct means threshold cycle.
